# Supplementary figures and images for: Changes in Foliar Functional Traits of S. pyrenaicus subsp. carpetanus under the Ongoing Climate Change: A Retrospective Survey
Source: MDPI journal article supplement (doi:10.3390/plants9030395), 2020-03-23

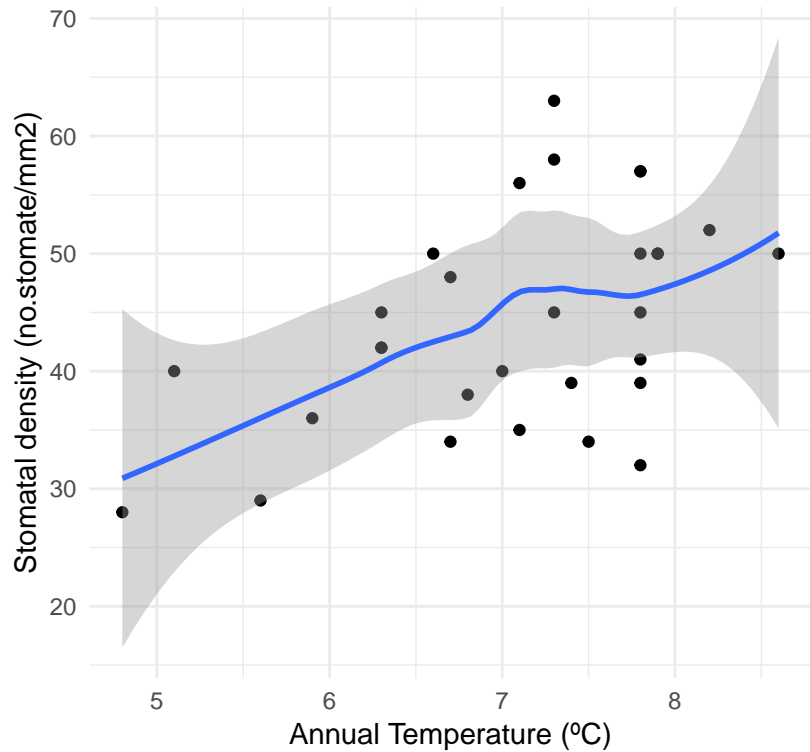

Supplement: s1 [file s1]

b)

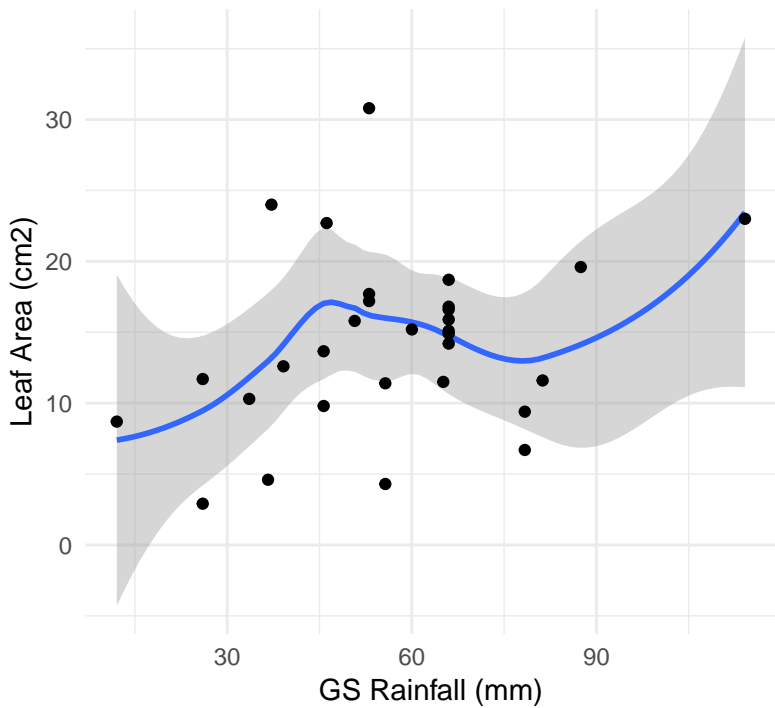

Supplement: s1 [file s1]

a)

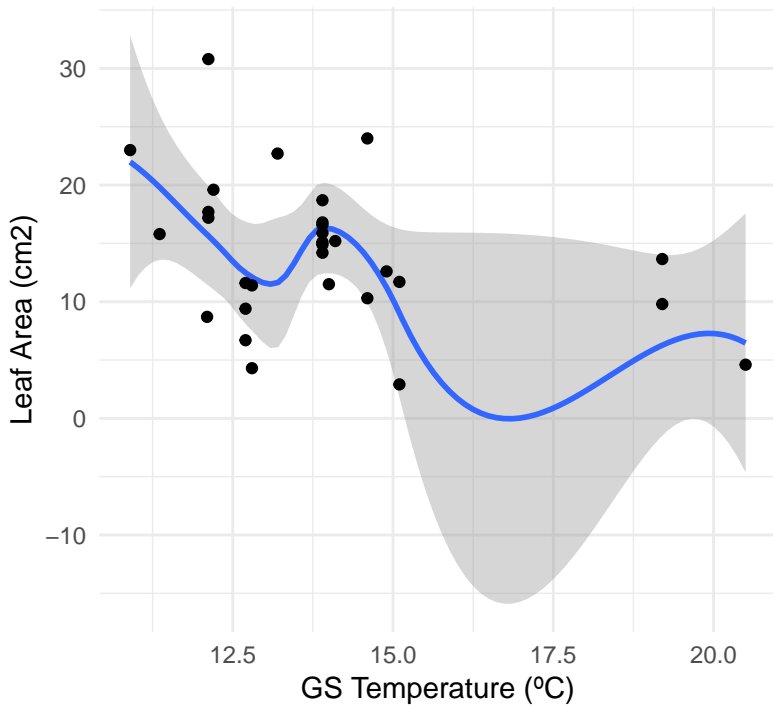

Supplement: s1 [file s1]

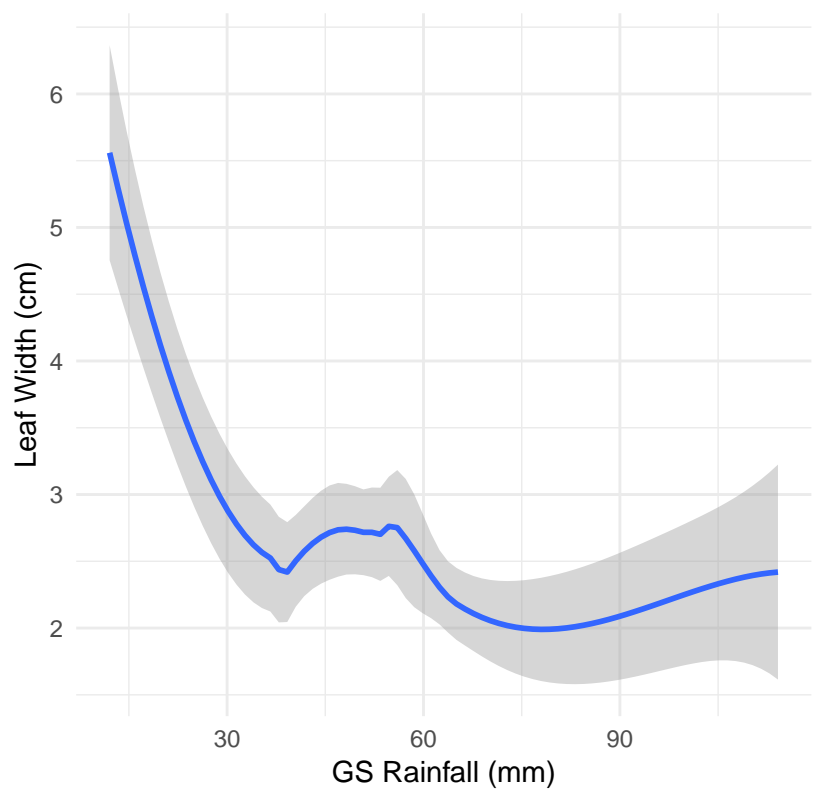

Supplement: s1 [file s1]
